# Supplementary material for: Impact of androgen deprivation therapy in patients with unfavorable intermediate-risk prostate cancer receiving brachytherapy-based dose-escalated radiation therapy
Source: PubMed Central journal article supplement — J Contemp Brachytherapy. 2024 Sep 12;16(4):268–72. doi: 10.5114/jcb.2024.143130 (PMC11609856; doi:10.5114/jcb.2024.143130), 2024-09-12
Supplement: JCB-16-54803-s001.pdf [file JCB-16-54803-s001.pdf]

**Supplementary Table 1.** Univariable hazard ratios for biochemical progression-free survival (bPFS) for all tested covariates

| Covariate                                      | Level                  | n   | bPFS (years)          |               |
|------------------------------------------------|------------------------|-----|-----------------------|---------------|
|                                                |                        |     | Hazard ratio (95% CI) | HR<br>p-value |
| Race                                           | African American/other | 76  | 2.17 (0.79-5.98)      | 0.134         |
|                                                | White                  | 125 | –                     | –             |
| Androgen deprivation therapy                   | No                     | 123 | 1.05 (0.38-2.90)      | 0.921         |
|                                                | Yes                    | 78  | –                     | –             |
| PSA                                            | ≥ 10                   | 40  | 3.51 (1.29-9.52)      | 0.014         |
|                                                | < 10                   | 161 | –                     | –             |
| Pre-treatment MRI                              | Yes                    | 122 | 2.64 (0.87-8.02)      | 0.086         |
|                                                | No                     | 79  | –                     | –             |
| Pre-treatment CT scan                          | Yes                    | 33  | 0.36 (0.05-2.70)      | 0.319         |
|                                                | No                     | 168 | –                     | –             |
| Pre-treatment bone scan                        | Yes                    | 115 | 0.79 (0.29-2.11)      | 0.632         |
|                                                | No                     | 86  | –                     | –             |
| Obese                                          | Yes                    | 39  | 0.80 (0.23-2.78)      | 0.725         |
|                                                | No                     | 56  | –                     | –             |
| Insurance                                      | Private                | 106 | 1.37 (0.49-3.87)      | 0.547         |
|                                                | Other/unknown          | 17  | 1.19 (0.14-10.02)     | 0.871         |
|                                                | Medicare               | 78  | –                     | –             |
| T stage                                        | T1                     | 132 | 0.60 (0.23-1.61%)     | 0.314         |
|                                                | T2                     | 68  | –                     | –             |
| Gleason score                                  | 3+4                    | 106 | 0.59 (0.22-1.58)      | 0.291         |
|                                                | 4+3                    | 95  | –                     | –             |
| Supplemental external radiation therapy        | No                     | 21  | 3.76 (0.76-18.62)     | 0.105         |
|                                                | Yes                    | 180 | –                     | –             |
| Supplemental external radiation therapy target | Prostate + SV          | 121 | 0.25 (0.06-1.00)      | 0.050         |
|                                                | Pelvis                 | 28  | 0.18 (0.03-1.04)      | 0.055         |
|                                                | No sEBRT               | 21  | –                     | –             |
| Percent of cores positive                      | ≥ 50%                  | 57  | 0.66 (0.09-4.72)      | 0.680         |
|                                                | < 50%                  | 31  | –                     | –             |
| Age                                            | Not applicable         | 200 | 0.98 (0.92-1.04)      | 0.477         |
| BMI                                            | Not applicable         | 95  | 1.02 (0.95-1.09)      | 0.625         |
